# Supplementary material for: A Bayesian Reanalysis of the Overall and Sex-Disaggregated Results of the Neonatal Oxygenation Prospective Meta-Analysis (NeOProM)
Source: MDPI journal article supplement (doi:10.3390/antiox13050509), 2024-04-24
Supplement: s1 [file s1]

## **Supplementary Materials:**

### **A Bayesian reanalysis of the overall and sex-disaggregated results of the NeOProM studies**

Maurice Jacob Huizing, Tamara Maria Hundscheid, František Bartoš, Eduardo Villamor.

**Table S1.** Bayesian model averaged (BMA) regression of the outcome death and/or major disability in the NeOProM trials (analyses with  $s = 1/2$ )

**Table S2.** Bayesian model averaged (BMA) regression of the outcomes related to neurodevelopmental impairment in the NeOProM trials (analyses with  $s = 1/2$ )

**Table S3.** Bayesian model averaged (BMA) regression of secondary outcomes in the NeOProM trials (analyses with  $s = 1/2$ )

**Table S4.** Comparison between the Bayes Factor (BF) values of the Bayesian model averaged (BMA) analysis and the p-values of the original NeOProM frequentist analysis for the outcomes death and/or major disability.

**Table S5.** Comparison between the Bayes Factor (BF) values of the Bayesian model averaged (BMA) analysis and the p-values of the original NeOProM frequentist analysis for the outcomes related to neurodevelopmental impairment.

**Table S6.** Comparison between the Bayes Factor (BF) values of the Bayesian model averaged (BMA) analysis and the p-values of the original NeOProM frequentist analysis for the secondary outcomes.

**Table S1.** Bayesian model averaged (BMA) regression of the outcome death and/or major disability in the NeOProM trials (analyses with  $s = 1/2$ )

| Outcome                                                    | All  |         |       | Female |         |       | Male |         |       | BF <sub>10</sub> | BF <sub>rf</sub> | BF <sub>mod</sub> | BF <sub>Female</sub> | BF <sub>Male</sub> |
|------------------------------------------------------------|------|---------|-------|--------|---------|-------|------|---------|-------|------------------|------------------|-------------------|----------------------|--------------------|
|                                                            | RR   | 95% CrI |       | RR     | 95% CrI |       | RR   | 95% CrI |       |                  |                  |                   |                      |                    |
|                                                            |      | Lower   | Upper |        | Lower   | Upper |      | Lower   | Upper |                  |                  |                   |                      |                    |
| Death or major disability (primary analysis)               | 1.03 | 0.98    | 1.09  | 1.00   | 0.93    | 1.09  | 1.03 | 0.98    | 1.10  | 0.30             | 0.10             | 0.47              | 0.35                 | 0.38               |
| Death or major disability (supportive analysis)            | 1.04 | 0.98    | 1.10  | 1.00   | 0.92    | 1.09  | 1.04 | 0.98    | 1.11  | 0.35             | 0.12             | 0.58              | 0.42                 | 0.46               |
| Death or major disability (secondary analysis)             | 1.05 | 0.97    | 1.14  | 1.02   | 0.92    | 1.14  | 1.04 | 0.96    | 1.14  | 0.51             | 0.16             | 0.49              | 0.45                 | 0.48               |
| Death or major disability (trialist defined)               | 1.07 | 0.99    | 1.14  | 1.02   | 0.91    | 1.13  | 1.07 | 0.99    | 1.15  | 1.00             | 0.18             | 0.78              | 0.71                 | 1.17               |
| Major disability (primary analysis)                        | 1.00 | 0.92    | 1.09  | 0.98   | 0.89    | 1.07  | 1.02 | 0.94    | 1.11  | 0.21             | 0.17             | 0.58              | 0.34                 | 0.34               |
| Major disability (supportive analysis)                     | 1.01 | 0.93    | 1.09  | 0.97   | 0.89    | 1.07  | 1.03 | 0.95    | 1.12  | 0.21             | 0.17             | 0.67              | 0.40                 | 0.39               |
| Major disability (secondary analysis)                      | 0.97 | 0.85    | 1.11  | 0.97   | 0.82    | 1.12  | 1.00 | 0.87    | 1.14  | 0.39             | 0.36             | 0.69              | 0.48                 | 0.47               |
| Major disability (trialist defined)                        | 1.03 | 0.93    | 1.14  | 0.97   | 0.87    | 1.11  | 1.05 | 0.96    | 1.16  | 0.31             | 0.22             | 1.00              | 0.57                 | 0.61               |
| Death prior to 18-24 months' age corrected for prematurity | 1.15 | 1.01    | 1.30  | 1.12   | 0.93    | 1.32  | 1.14 | 0.98    | 1.32  | 3.50             | 0.51             | 0.62              | 1.75                 | 1.99               |
| Death prior to 36 weeks' postmenstrual age                 | 1.15 | 1.01    | 1.32  | 1.13   | 0.92    | 1.34  | 1.14 | 0.97    | 1.34  | 3.26             | 0.51             | 0.65              | 1.75                 | 2.07               |
| Death prior to discharge                                   | 1.14 | 1.01    | 1.29  | 1.11   | 0.91    | 1.30  | 1.14 | 0.98    | 1.32  | 3.04             | 0.46             | 0.67              | 1.50                 | 1.94               |

The table show the analyses with  $s = 1/2$  (i.e., the expected difference of each moderator level corresponding to  $1/2$  of the mean effect size).

BF: Bayes factor; CrI: credible interval; RR: risk ratio.

RR>1 indicates higher risk with lower SpO<sub>2</sub> range (85-89% vs. 91-95%).

**Table S2.** Bayesian model averaged (BMA) regression of the outcomes related to neurodevelopmental impairment in the NeOProM trials (analyses with  $s = 1/2$ )

| Outcome                                     | All  |         |       | Female |         |       | Male |         |       | BF <sub>10</sub> | BF <sub>rf</sub> | BF <sub>mod</sub> | BF <sub>Female</sub> | BF <sub>Male</sub> |
|---------------------------------------------|------|---------|-------|--------|---------|-------|------|---------|-------|------------------|------------------|-------------------|----------------------|--------------------|
|                                             | RR   | 95% CrI |       | RR     | 95% CrI |       | RR   | 95% CrI |       |                  |                  |                   |                      |                    |
|                                             |      | Lower   | Upper |        | Lower   | Upper |      | Lower   | Upper |                  |                  |                   |                      |                    |
| Cerebral palsy with GMFCS ≥ 2               | 1.01 | 0.81    | 1.26  | 1.01   | 0.82    | 1.26  | 1.00 | 0.82    | 1.23  | 0.55             | 0.59             | 0.84              | 0.63                 | 0.64               |
| Severe visual impairment (trialist defined) | 1.05 | 0.74    | 1.51  | 1.00   | 0.73    | 1.45  | 1.06 | 0.77    | 1.51  | 0.83             | 0.99             | 1.08              | 0.95                 | 0.94               |
| Deafness requiring hearing aids or worse    | 1.00 | 0.76    | 1.32  | 0.97   | 0.74    | 1.27  | 1.04 | 0.80    | 1.32  | 0.67             | 0.96             | 1.09              | 0.81                 | 0.79               |
| Bayley-III language and/or cognitive <85    | 1.00 | 0.92    | 1.09  | 0.98   | 0.90    | 1.08  | 1.02 | 0.93    | 1.11  | 0.22             | 0.16             | 0.52              | 0.33                 | 0.32               |
| Bayley-III cognitive <85                    | 1.04 | 0.91    | 1.20  | 1.01   | 0.88    | 1.19  | 1.03 | 0.90    | 1.19  | 0.41             | 0.44             | 0.65              | 0.48                 | 0.48               |
| Bayley-III language <85                     | 1.03 | 0.94    | 1.13  | 0.99   | 0.88    | 1.11  | 1.04 | 0.95    | 1.15  | 0.29             | 0.31             | 0.70              | 0.45                 | 0.47               |
| Bayley-III language or cognitive <70        | 0.96 | 0.81    | 1.13  | 0.97   | 0.80    | 1.14  | 0.98 | 0.83    | 1.15  | 0.49             | 0.52             | 0.73              | 0.55                 | 0.52               |
| Bayley-III cognitive <70                    | 1.02 | 0.82    | 1.30  | 1.03   | 0.83    | 1.30  | 1.00 | 0.82    | 1.25  | 0.58             | 1.00             | 0.89              | 0.64                 | 0.64               |
| Bayley-III language <70                     | 1.00 | 0.84    | 1.19  | 0.99   | 0.83    | 1.17  | 1.01 | 0.86    | 1.19  | 0.43             | 0.44             | 0.76              | 0.55                 | 0.53               |

The table show the analyses with  $s = 1/2$  (i.e., the expected difference of each moderator level corresponding to 1/2 of the mean effect size).

BF: Bayes factor; CrI: credible interval; GMFCS: Gross Motor Function Classification System; RR: risk ratio.

RR>1 indicates higher risk with lower SpO<sub>2</sub> range (85-89% vs. 91-95%).

**Table S3.** Bayesian model averaged (BMA) regression of secondary outcomes in the NeOProM trials (analyses with  $s = 1/2$ )

| Outcome                                                               | All  |         |       | Female |         |       | Male |         |       | BF <sub>10</sub> | BF <sub>rf</sub> | BF <sub>mod</sub> | BF <sub>Female</sub> | BF <sub>Male</sub> |
|-----------------------------------------------------------------------|------|---------|-------|--------|---------|-------|------|---------|-------|------------------|------------------|-------------------|----------------------|--------------------|
|                                                                       | RR   | 95% CrI |       | RR     | 95% CrI |       | RR   | 95% CrI |       |                  |                  |                   |                      |                    |
|                                                                       |      | Lower   | Upper |        | Lower   | Upper |      | Lower   | Upper |                  |                  |                   |                      |                    |
| PDA medically or surgically treated                                   | 1.01 | 0.95    | 1.08  | 1.00   | 0.94    | 1.07  | 1.01 | 0.95    | 1.08  | 0.17             | 0.05             | 0.35              | 0.23                 | 0.23               |
| PDA surgically treated                                                | 1.13 | 0.97    | 1.33  | 1.11   | 0.93    | 1.35  | 1.09 | 0.90    | 1.33  | 1.35             | 0.39             | 0.71              | 1.03                 | 0.92               |
| Severe NEC                                                            | 1.26 | 1.04    | 1.53  | 1.22   | 0.92    | 1.53  | 1.27 | 1.02    | 1.59  | 9.31             | 0.43             | 0.92              | 3.65                 | 6.53               |
| Treated ROP                                                           | 0.81 | 0.65    | 1.03  | 0.85   | 0.65    | 1.12  | 0.82 | 0.63    | 1.07  | 3.33             | 8.78             | 0.90              | 1.90                 | 2.25               |
| Positive airway pressure with ETT at 36 weeks' PMA                    | 0.99 | 0.82    | 1.19  | 0.93   | 0.77    | 1.14  | 1.06 | 0.87    | 1.25  | 0.48             | 0.65             | 1.42              | 0.89                 | 0.84               |
| Positive airway pressure without ETT at 36 weeks' PMA                 | 0.91 | 0.81    | 1.02  | 0.92   | 0.79    | 1.06  | 0.94 | 0.81    | 1.09  | 1.33             | 0.72             | 0.60              | 0.97                 | 0.83               |
| Supplemental oxygen without positive airway pressure at 36 weeks' PMA | 0.83 | 0.75    | 0.92  | 0.81   | 0.71    | 0.92  | 0.84 | 0.75    | 0.96  | 99.63            | 0.21             | 0.72              | 40.79                | 11.31              |
| Moderate to severe BPD                                                | 0.89 | 0.82    | 0.95  | 0.84   | 0.76    | 0.95  | 0.95 | 0.83    | 1.04  | 19.74            | 0.70             | 4.43              | 17.44                | 0.54               |
| Discharged home on oxygen                                             | 1.01 | 0.90    | 1.13  | 0.99   | 0.88    | 1.12  | 1.02 | 0.90    | 1.14  | 0.30             | 0.39             | 0.59              | 0.40                 | 0.40               |
| Readmission to hospital                                               | 1.01 | 0.95    | 1.08  | 0.98   | 0.91    | 1.06  | 1.03 | 0.96    | 1.10  | 0.17             | 0.25             | 0.60              | 0.32                 | 0.33               |

The table show the analyses with  $s = 1/2$  (i.e., the expected difference of each moderator level corresponding to 1/2 of the mean effect size).

BF: Bayes factor; BPD: bronchopulmonary dysplasia; CrI: credible interval; ETT: endotracheal tube; NEC: necrotizing enterocolitis; PDA: patent ductus arteriosus; PMA: postmenstrual age; ROP: retinopathy of prematurity; RR: risk ratio.

RR>1 indicates higher risk with lower SpO<sub>2</sub> range (85-89% vs. 91-95%).

**Table S4.** Comparison between the Bayes Factor (BF) values of the Bayesian model averaged (BMA) analysis and the p-values of the original NeOProM frequentist analysis for the outcomes death and/or major disability.

| Outcome                                                    | Overall          |                            | Female               |                            | Male               |                            | Interaction of sex |                            |
|------------------------------------------------------------|------------------|----------------------------|----------------------|----------------------------|--------------------|----------------------------|--------------------|----------------------------|
|                                                            | BF <sub>10</sub> | <i>Frequentist p-value</i> | BF <sub>Female</sub> | <i>Frequentist p-value</i> | BF <sub>Male</sub> | <i>Frequentist p-value</i> | BF <sub>mod</sub>  | <i>Frequentist p-value</i> |
| Death or major disability (primary analysis)               | 0.30             | 0.210                      | 0.45                 | 0.724                      | 0.48               | 0.150                      | 0.76               | 0.543                      |
| Death or major disability (supportive analysis)            | 0.35             | 0.200                      | 0.52                 | 0.838                      | 0.59               | 0.106                      | 0.88               | 0.476                      |
| Death or major disability (secondary analysis)             | 0.51             | 0.156 <sup>a</sup>         | 0.53                 | 0.489                      | 0.55               | 0.217                      | 0.75               | 0.852                      |
| Death or major disability (trialist defined)               | 1.04             | 0.031 <sup>a</sup>         | 0.85                 | 0.632                      | 1.19               | 0.030                      | 1.06               | 0.383                      |
| Major disability (primary analysis)                        | 0.21             | 0.950                      | 0.43                 | 0.479                      | 0.42               | 0.521                      | 0.84               | 0.338                      |
| Major disability (supportive analysis)                     | 0.21             | 0.870                      | 0.46                 | 0.471                      | 0.46               | 0.421                      | 0.92               | 0.333                      |
| Major disability (secondary analysis)                      | 0.38             | 0.661 <sup>a</sup>         | 0.54                 | 0.418                      | 0.53               | 0.857                      | 0.89               | 0.529                      |
| Major disability (trialist defined)                        | 0.32             | 0.367 <sup>a</sup>         | 0.57                 | 0.589                      | 0.63               | 0.186                      | 1.14               | 0.258                      |
| Death prior to 18-24 months' age corrected for prematurity | 3.60             | 0.010                      | 2.17                 | 0.130                      | 2.45               | 0.029                      | 0.84               | 0.840                      |
| Death prior to 36 weeks' postmenstrual age                 | 3.33             | 0.010                      | 2.08                 | 0.156                      | 2.26               | 0.037                      | 0.86               | 0.814                      |
| Death prior to discharge                                   | 3.15             | 0.010                      | 1.96                 | 0.208                      | 2.22               | 0.024                      | 0.88               | 0.648                      |

BF: Bayes factor; CrI: credible interval; RR: risk ratio.

<sup>a</sup>P-value not available in the original study and calculated by means of a random effects meta-frequentist meta-analysis.

**Table S5.** Comparison between the Bayes Factor (BF) values of the Bayesian model averaged (BMA) analysis and the p-values of the original NeOProM frequentist analysis for the outcomes related to neurodevelopmental impairment.

| Outcome                                     | Overall          |                            | Female               |                            | Male               |                            | Interaction of sex |                            |
|---------------------------------------------|------------------|----------------------------|----------------------|----------------------------|--------------------|----------------------------|--------------------|----------------------------|
|                                             | BF <sub>10</sub> | <i>Frequentist p-value</i> | BF <sub>Female</sub> | <i>Frequentist p-value</i> | BF <sub>Male</sub> | <i>Frequentist p-value</i> | BF <sub>mod</sub>  | <i>Frequentist p-value</i> |
| Cerebral palsy with GMFCS $\geq 2$          | 0.55             | <i>0.880</i>               | 0.67                 | <i>0.826</i>               | 0.66               | <i>0.972</i>               | 0.95               | <i>0.862</i>               |
| Severe visual impairment (trialist defined) | 0.83             | <i>0.730</i>               | 0.89                 | <i>0.222</i>               | 0.90               | <i>0.161</i>               | 1.02               | <i>0.076</i>               |
| Deafness requiring hearing aids or worse    | 0.67             | <i>0.790</i>               | 0.77                 | <i>0.208</i>               | 0.76               | <i>0.220</i>               | 1.03               | <i>0.094</i>               |
| Bayley-III language and/or cognitive <85    | 0.22             | <i>0.920</i>               | 0.40                 | <i>0.416</i>               | 0.39               | <i>0.618</i>               | 0.77               | <i>0.449</i>               |
| Bayley-III cognitive <85                    | 0.41             | <i>0.524<sup>a</sup></i>   | 0.54                 | <i>0.540</i>               | 0.53               | <i>0.668</i>               | 0.86               | <i>0.844</i>               |
| Bayley-III language <85                     | 0.30             | <i>0.451<sup>a</sup></i>   | 0.54                 | <i>0.530</i>               | 0.51               | <i>0.353</i>               | 0.93               | <i>0.395</i>               |
| Bayley-III language or cognitive <70        | 0.48             | <i>0.513<sup>a</sup></i>   | 0.58                 | <i>0.548</i>               | 0.58               | <i>0.622</i>               | 0.91               | <i>0.912</i>               |
| Bayley-III cognitive <70                    | 0.58             | <i>0.703<sup>a</sup></i>   | 0.68                 | <i>0.615</i>               | 0.67               | <i>0.729</i>               | 0.97               | <i>0.456</i>               |
| Bayley-III language <70                     | 0.43             | <i>0.947<sup>a</sup></i>   | 0.56                 | <i>0.865</i>               | 0.57               | <i>0.888</i>               | 0.92               | <i>0.901</i>               |

BF: Bayes factor; CrI: credible interval; GMFCS: Gross Motor Function Classification System; RR: risk ratio.

<sup>a</sup>P-value not available in the original study and calculated by means of a random effects meta-frequentist meta-analysis.

**Table S6.** Comparison between the Bayes Factor (BF) values of the Bayesian model averaged (BMA) analysis and the p-values of the original NeOProM frequentist analysis for the secondary outcomes.

| Outcome                                                               | Overall          |                     | Female               |                     | Male               |                     | Interaction of sex |                     |
|-----------------------------------------------------------------------|------------------|---------------------|----------------------|---------------------|--------------------|---------------------|--------------------|---------------------|
|                                                                       | BF <sub>10</sub> | Frequentist p-value | BF <sub>Female</sub> | Frequentist p-value | BF <sub>Male</sub> | Frequentist p-value | BF <sub>mod</sub>  | Frequentist p-value |
| PDA medically or surgically treated                                   | 0.17             | 0.710               | 0.30                 | 0.853               | 0.30               | 0.521               | 0.60               | 0.722               |
| PDA surgically treated                                                | 1.35             | 0.046               | 1.06                 | 0.141               | 1.06               | 0.156               | 0.90               | 0.989               |
| Severe NEC                                                            | 9.94             | 0.003               | 5.82                 | 0.243               | 6.52               | 0.004               | 0.99               | 0.384               |
| Treated ROP                                                           | 3.36             | <0.001              | 2.40                 | 0.115               | 2.43               | <0.001              | 0.98               | 0.212               |
| Positive airway pressure with ETT at 36 weeks' PMA                    | 0.47             | 0.966 <sup>a</sup>  | 0.73                 | 0.118               | 0.72               | 0.273               | 1.15               | 0.055               |
| Positive airway pressure without ETT at 36 weeks' PMA                 | 1.32             | 0.065 <sup>a</sup>  | 1.07                 | 0.032               | 0.99               | 0.282               | 0.83               | 0.369               |
| Supplemental oxygen without positive airway pressure at 36 weeks' PMA | 99.49            | <0.001              | 49.31                | <0.001              | 31.11              | 0.025               | 0.93               | 0.213               |
| Moderate to severe BPD                                                | 14.44            | 0.001 <sup>a</sup>  | 12.32                | <0.001 <sup>a</sup> | 1.32               | 0.101 <sup>a</sup>  | 3.41               | 0.037 <sup>a</sup>  |
| Discharged home on oxygen                                             | 0.30             | 0.866 <sup>a</sup>  | 0.46                 | 0.783               | 0.46               | 0.638               | 0.83               | 0.536               |
| Readmission to hospital                                               | 0.17             | 0.640               | 0.43                 | 0.514               | 0.43               | 0.437               | 0.91               | 0.286               |

BF: Bayes factor; BPD: bronchopulmonary dysplasia; CrI: credible interval; ETT: endotracheal tube; NEC: necrotizing enterocolitis; PDA: patent ductus arteriosus; PMA: postmenstrual age; ROP: retinopathy of prematurity; RR: risk ratio.

<sup>a</sup>P-value not available in the original study and calculated by means of a random effects meta-frequentist meta-analysis.
